# Supplementary material
Source: PubMed Central journal article supplement (PMC4136300)
Supplement: JVI.00768-14_zjv999099318so3.pdf [file JVI.00768-14_zjv999099318so3.pdf]

## Supplementary Information

### Table of content

1. Supplementary Table 1. Summary of RNAseq data and mapping statistics
2. Supplementary Table 2. Biological functions enriched in 12 hpi DE genes, derived from IPA analysis. (MS Excel table submitted separately)
3. Supplementary Table 3. IPA predicted functions commonly enriched in DE genes induced by HIV-1 infection and UV in-activated virions. (MS Excel table submitted separately)
4. Supplementary Table 4. Top 20 drugs from connectivity map search
5. Supplementary Table 5. The enrichment of TF targets in genes with reversed expression changes.
6. Supplementary Table 6. The list of microarray datasets compiled from GEO.
7. Supplementary Figure 1. Summary of Total RNAseq enriched genes.
8. Supplementary Figure 2. Comparison of Total RNAseq measurements with qPCR and mRNAseq measurements.
9. Supplementary Figure 3. Heatmap of the full list of 1,933 DE genes at 12 hpi, similarly shown in Figure 2A.
10. Supplementary Figure 4. Radio plot showing the relative percentages of genes from the four subgroups in Figure 2, for each of 14 enriched functions.
11. Supplementary Figure 5. Hierarchical clustering of 58 enriched TFs, based on their binding site co-occurrences in the promoters of similar sets of DE genes at 12 hpi during HIV-1 infection.
12. Supplementary Figure 6. LncRNA function and TF inference.
13. Supplementary Figure 7. Regression coefficients of the predictive models learned from the compendium expression data.
14. Supplementary Figure 8. Predicted gene module expression changes at 12hpi during HIV infection for all 9 gene modules.
15. Supplementary Figure 9. Predicted gene module expression changes at 24hpi during HIV infection for all 9 gene modules.
16. Supplementary Figure 10. Supplementary Figure 10. Cell counts under lycorine treatment, without HIV infection.

Supplementary Table 1. Summary of RNAseq data and mapping statistics

| NGS protocol | Time-point (hpi) | Infection | Replicate sample id | rRNA      | %    | HIV       | %    | Human      | %    |
|--------------|------------------|-----------|---------------------|-----------|------|-----------|------|------------|------|
| mRNAseq      | 12               | Mock      | Mock12hr1           | 304,704   | 1.3  | 26        | 0.0  | 23,558,521 | 98.7 |
|              |                  |           | Mock12hr2           | 305,530   | 1.2  | 40        | 0.0  | 25,447,126 | 98.8 |
|              |                  |           | Mock12hr3           | 242,120   | 1.3  | 471       | 0.0  | 19,040,603 | 98.7 |
|              |                  | HIV       | HIV12hr7            | 322,300   | 1.4  | 3,989,152 | 17.2 | 18,916,407 | 81.4 |
|              |                  |           | HIV12hr8            | 369,444   | 1.3  | 5,313,320 | 18.8 | 22,608,978 | 79.9 |
|              |                  |           | HIV12hr9            | 215,699   | 1.4  | 2,564,062 | 17.1 | 12,227,602 | 81.5 |
|              | 24               | Mock      | Mock24hr1           | 386,502   | 1.3  | 24        | 0.0  | 28,686,704 | 98.7 |
|              |                  |           | Mock24hr2           | 204,187   | 1.3  | 428       | 0.0  | 15,958,896 | 98.7 |
|              |                  |           | Mock24hr3           | 241,182   | 1.2  | 41        | 0.0  | 19,075,948 | 98.8 |
|              |                  | HIV       | HIV24hr7            | 178,442   | 1.0  | 6,276,673 | 33.6 | 12,253,141 | 65.5 |
|              |                  |           | HIV24hr8            | 224,052   | 1.1  | 7,924,233 | 39.6 | 11,848,320 | 59.3 |
|              |                  |           | HIV24hr9            | 200,501   | 1.0  | 7,980,792 | 39.2 | 12,182,433 | 59.8 |
| TotalRNAseq  | 12               | Mock      | 12_1                | 5,427,297 | 37.8 | 4         | 0.0  | 8,925,352  | 62.2 |
|              |                  |           | 12_2                | 5,342,090 | 47.1 | 6         | 0.0  | 6,007,577  | 52.9 |
|              |                  |           | 12_3                | 7,147,336 | 38.4 | 1         | 0.0  | 11,456,285 | 61.6 |
|              |                  | UV        | 12_4                | 7,116,100 | 43.0 | 93        | 0.0  | 9,429,803  | 57.0 |
|              |                  |           | 12_5                | 5,248,656 | 37.7 | 83        | 0.0  | 8,659,522  | 62.3 |
|              |                  |           | 12_6                | 5,160,715 | 32.7 | 76        | 0.0  | 10,632,308 | 67.3 |
|              |                  | HIV       | 12_7                | 6,798,271 | 43.4 | 397,910   | 2.5  | 8,468,576  | 54.1 |
|              |                  |           | 12_8                | 7,455,689 | 47.5 | 362,234   | 2.3  | 7,865,152  | 50.2 |
|              |                  |           | 12_9                | 8,074,012 | 41.6 | 575,326   | 3.0  | 10,747,857 | 55.4 |
|              | 24               | Mock      | 24_1                | 6,926,666 | 51.8 | 0         | 0.0  | 6,436,364  | 48.2 |
|              |                  |           | 24_3                | 8,670,783 | 53.1 | 17        | 0.0  | 7,657,739  | 46.9 |
|              |                  |           | 24_4                | 6,307,389 | 49.3 | 34        | 0.0  | 6,484,650  | 50.7 |
|              |                  | UV        | 24_6                | 7,056,634 | 43.7 | 674       | 0.0  | 9,082,503  | 56.3 |
|              |                  |           | 24_7                | 6,496,832 | 35.5 | 2,279,160 | 12.5 | 9,530,047  | 52.1 |
|              |                  |           | 24_8                | 6,379,398 | 40.3 | 1,610,363 | 10.2 | 7,835,967  | 49.5 |
|              |                  | HIV       | 24_9                | 6,677,142 | 41.2 | 2,032,685 | 12.5 | 7,514,187  | 46.3 |

mRNAseq: 75nt single end reads. Total RNAseq: 2x90nt paired-end reads. Mock: cells treated with conditioned medium, as control. HIV: cells infected with intact HIV-1 viruses. UV: cells treated with UV-inactivated HIV-1 virions. rRNA: reads mapped to a collection of human ribosomal RNA sequences. HIV: reads mapped to the reference HIV-1 genome. Human: reads mapped to human reference genome.

Supplementary Table 4. Top 20 drugs from connectivity map search.

| Rank | Compound name  | Mean of connectivity scores                             | Number of instances | Enrichment score | Enrichment p-value |
|------|----------------|---------------------------------------------------------|---------------------|------------------|--------------------|
| 1    | GW-8510        | 0.813                                                   | 4                   | 0.994            | 0                  |
| 2    | lycorine       | -0.699<br>(-0.629, -0.639,<br>-0.672, -0.694,<br>-0.86) | 5                   | -0.973           | 0                  |
| 3    | trichostatin A | 0.345                                                   | 182                 | 0.428            | 0                  |
| 4    | camptothecin   | 0.82                                                    | 3                   | 0.994            | 0.00002            |
| 5    | alsterpallone  | 0.8                                                     | 3                   | 0.993            | 0.00002            |
| 6    | irinotecan     | 0.792                                                   | 3                   | 0.992            | 0.00002            |
| 7    | mitoxantrone   | 0.725                                                   | 3                   | 0.977            | 0.00004            |
| 8    | azacitidine    | 0.752                                                   | 3                   | 0.974            | 0.00004            |
| 9    | daunorubicin   | 0.698                                                   | 4                   | 0.93             | 0.00004            |
| 10   | resveratrol    | 0.546                                                   | 9                   | 0.716            | 0.00004            |
| 11   | cidospirin     | 0.318                                                   | 6                   | 0.759            | 0.00048            |
| 12   | vorinostat     | 0.416                                                   | 12                  | 0.551            | 0.00048            |
| 13   | wortmannin     | 0.239                                                   | 18                  | 0.452            | 0.00062            |
| 14   | methotrexate   | 0.483                                                   | 8                   | 0.655            | 0.00076            |
| 15   | carbamazole    | -0.537                                                  | 3                   | -0.909           | 0.00138            |
| 16   | SR-95531       | -0.416                                                  | 4                   | -0.83            | 0.00155            |
| 17   | Prestwick-1080 | -0.263                                                  | 4                   | -0.825           | 0.00177            |
| 18   | monensin       | 0.278                                                   | 6                   | 0.685            | 0.00246            |
| 19   | diazoxide      | -0.334                                                  | 5                   | -0.731           | 0.0029             |
| 20   | theobromine    | -0.385                                                  | 4                   | -0.794           | 0.00356            |

Notes: rows in blue are compounds with negative connectivity scores. Inside parenthesis are the individual connectivity scores for lycorine.

Supplementary Table 5. The enrichment of TF targets in genes with reversed expression changes.

| Transcription Factor (TF) | Enrichment p-value | TF DE at 12 hpi | TF DE at 12 hpi and in subgroups a and b |
|---------------------------|--------------------|-----------------|------------------------------------------|
| MYC                       | 0.000282801        | TRUE            | TRUE                                     |
| ETS1                      | 0.000328471        | TRUE            | TRUE                                     |
| IRF1                      | 0.010901002        | TRUE            | TRUE                                     |
| ELK4                      | 0.029802343        | TRUE            | TRUE                                     |
| GTF2F1                    | 0.003459991        | TRUE            | FALSE                                    |
| TAF1                      | 0.003846276        | TRUE            | FALSE                                    |
| ELF1                      | 0.013188921        | TRUE            | FALSE                                    |
| REST                      | 0.130985877        | TRUE            | FALSE                                    |
| BCLAF1                    | 0.154816551        | TRUE            | FALSE                                    |
| IRF3                      | 0.325424325        | TRUE            | FALSE                                    |
| ZBTB33                    | 0.420432008        | TRUE            | FALSE                                    |
| MAX                       | 0.000101078        | FALSE           | FALSE                                    |
| ZNF143                    | 0.000737502        | FALSE           | FALSE                                    |
| E2F1                      | 0.001299821        | FALSE           | FALSE                                    |
| HEY1                      | 0.001971921        | FALSE           | FALSE                                    |
| TBP                       | 0.006611031        | FALSE           | FALSE                                    |
| SP1                       | 0.016741588        | FALSE           | FALSE                                    |
| NRF1                      | 0.045376381        | FALSE           | FALSE                                    |
| NR3C1                     | 0.068690462        | FALSE           | FALSE                                    |
| E2F4                      | 0.076843823        | FALSE           | FALSE                                    |
| JUND                      | 0.079408873        | FALSE           | FALSE                                    |
| GTF2B                     | 0.079633892        | FALSE           | FALSE                                    |
| SRF                       | 0.085635293        | FALSE           | FALSE                                    |
| TAF7                      | 0.089958648        | FALSE           | FALSE                                    |
| SETDB1                    | 0.109188848        | FALSE           | FALSE                                    |
| SP2                       | 0.132601963        | FALSE           | FALSE                                    |
| EP300                     | 0.191966414        | FALSE           | FALSE                                    |
| STAT2                     | 0.20196601         | FALSE           | FALSE                                    |
| STAT1                     | 0.243178518        | FALSE           | FALSE                                    |
| NFYA                      | 0.418352547        | FALSE           | FALSE                                    |
| TCF4                      | 0.523971842        | FALSE           | FALSE                                    |
| STAT3                     | 0.619749701        | FALSE           | FALSE                                    |

Supplementary Table 6. The list of microarray datasets compiled from GEO.

| Description                                                                 | GSE accession                       | Publication    |
|-----------------------------------------------------------------------------|-------------------------------------|----------------|
| Treated Jurkat cells                                                        | GSE46909                            | PMID: 23824090 |
| Treated Jurkat cells                                                        | GSE10737,GSE10232                   | PMID: 18773076 |
| Treated MM6 cells                                                           | GSE10739,GSE10738,GSE10233,GSE10234 | PMID: 18773076 |
| Regulatory T cell time course                                               | GSE11292                            | PMID: 23169000 |
| T effector cell time course                                                 | GSE11292                            | PMID: 23169000 |
| T effector cell expressing GFP                                              | GSE11292                            | PMID: 23169000 |
| T effector cell over-expressing GARP                                        | GSE11292                            | PMID: 23169000 |
| CD4+ T cells infected with HIV-1 viruses that lack different viral proteins | GSE12963                            | PMID: 19050264 |
| CD4+ T cells from HIV positive or negative individuals                      | GSE9927                             | PMID: 18077723 |
| Lymph nodes from HIV positive or negative individuals                       | GSE16363                            | PMID: 21525393 |
| Pathogen-specific CD4+ T cell sub-populations from the same PBMC            | GSE42853                            | PMID: 23258923 |
| CD4+ T cells from both HIV resistant and HIV low-risk negative individuals  | GSE14278                            | PMID: 20887221 |
| Th1 and Th1Th17 CD4+ T-cells                                                | GSE50175                            | PMID: 24359430 |

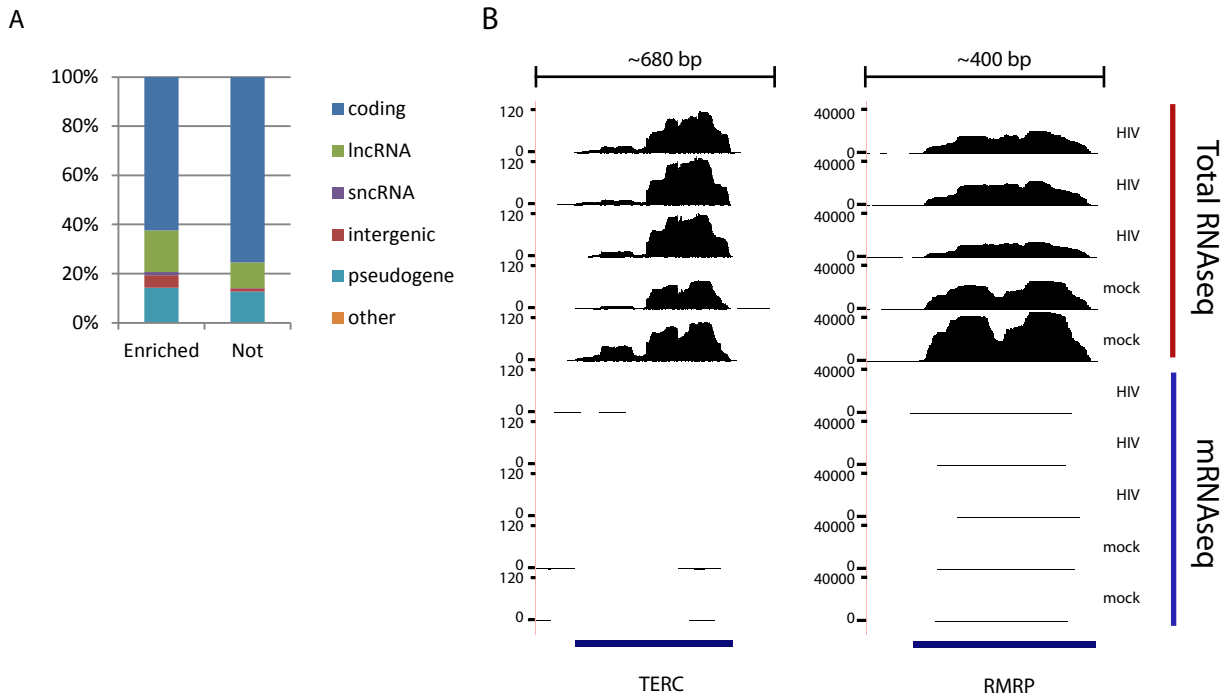

Supplementary Figure 1. Summary of Total RNAseq enriched genes. A. Percentages of gene types in the list of Total RNAseq enriched genes (Enriched) vs. the rest of detected genes (Not). Table 1 shows the classification of gene biotypes. B. Raw read coverage across TERC and RMRP genes, known to transcribe polyA- transcripts, in the samples collected at 24 hpi.

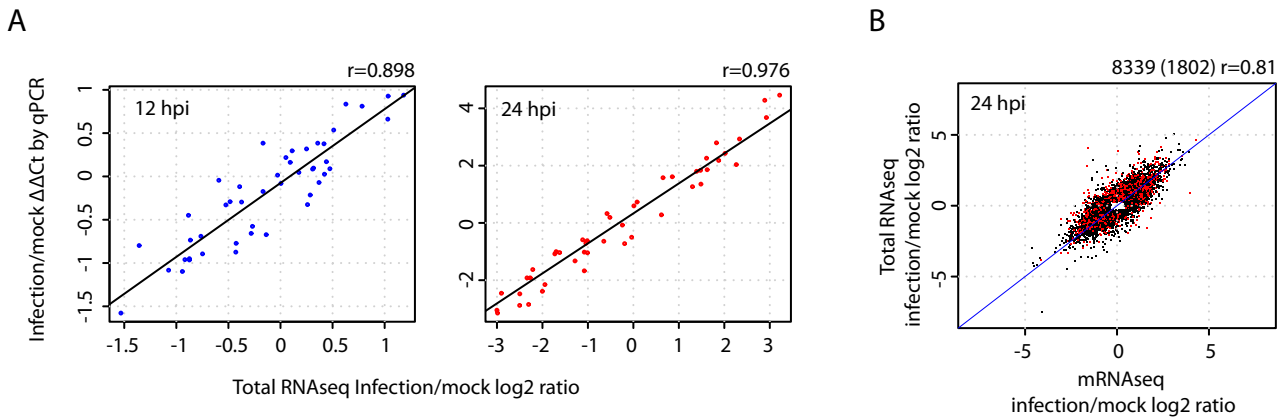

Supplementary Figure 2. Comparison of Total RNAseq measurements with qPCR and mRNAseq measurements. A. Scatter plot showing the agreements between the measurements by qPCR vs. Total RNAseq on the same set of 46 annotated protein-coding genes at both 12 and 24 hpi. The Pearson correlation coefficient between qPCR and Total RNAseq is shown on the top right corner of each scatter plot. B. Scatterplot of host expression changes relative to time matched mocks after HIV-1 infection measured by mRNAseq vs. that by Total RNAseq at 24 hpi. Only genes which were identified as differentially expressed by either RNAseq and detected by both RNAseq were included. Those genes which were enriched by Total RNAseq (described in the main text) are in red. The numbers on the top right corner are in the order of: the total number of genes plotted, the subset of genes which were considered as enriched by Total RNAseq (in red), and the Pearson correlation of log<sub>2</sub> infection/mock ratios of all genes.

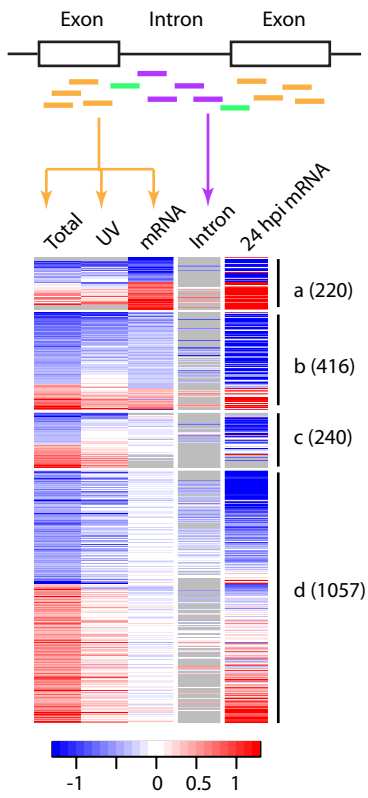

Supplementary Figure 3. Heatmap of the full list of 1,933 DE genes at 12 hpi, similarly shown in Figure 2A.



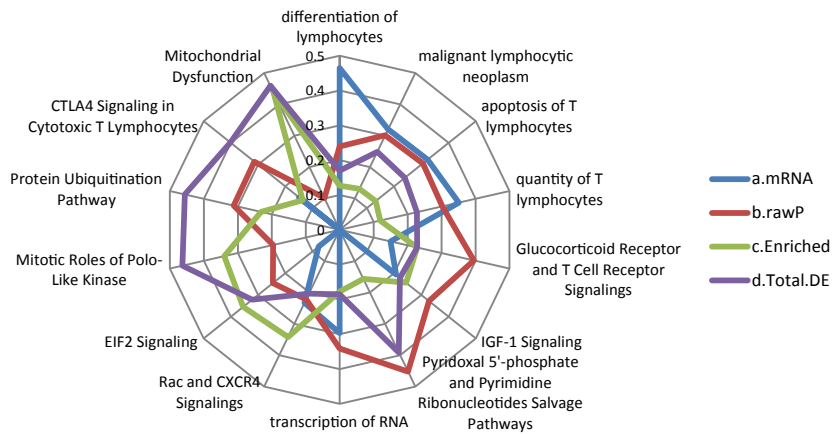

Supplementary Figure 4. Radio plot showing the relative percentages of genes from the four subgroups in Figure 2, for each of 14 enriched functions. Enriched functions were identified in the genes in using IPA. For each of 14 enriched functions, we counted the number of genes from each subgroup. These gene counts were scaled by the total number of genes in the corresponding subgroup, and denoted as normalized gene count. The relative contributions of individual subgroups to an enriched function was calculated as the ratio between its normalized gene count and the sum of normalized gene counts of all four subgroups.

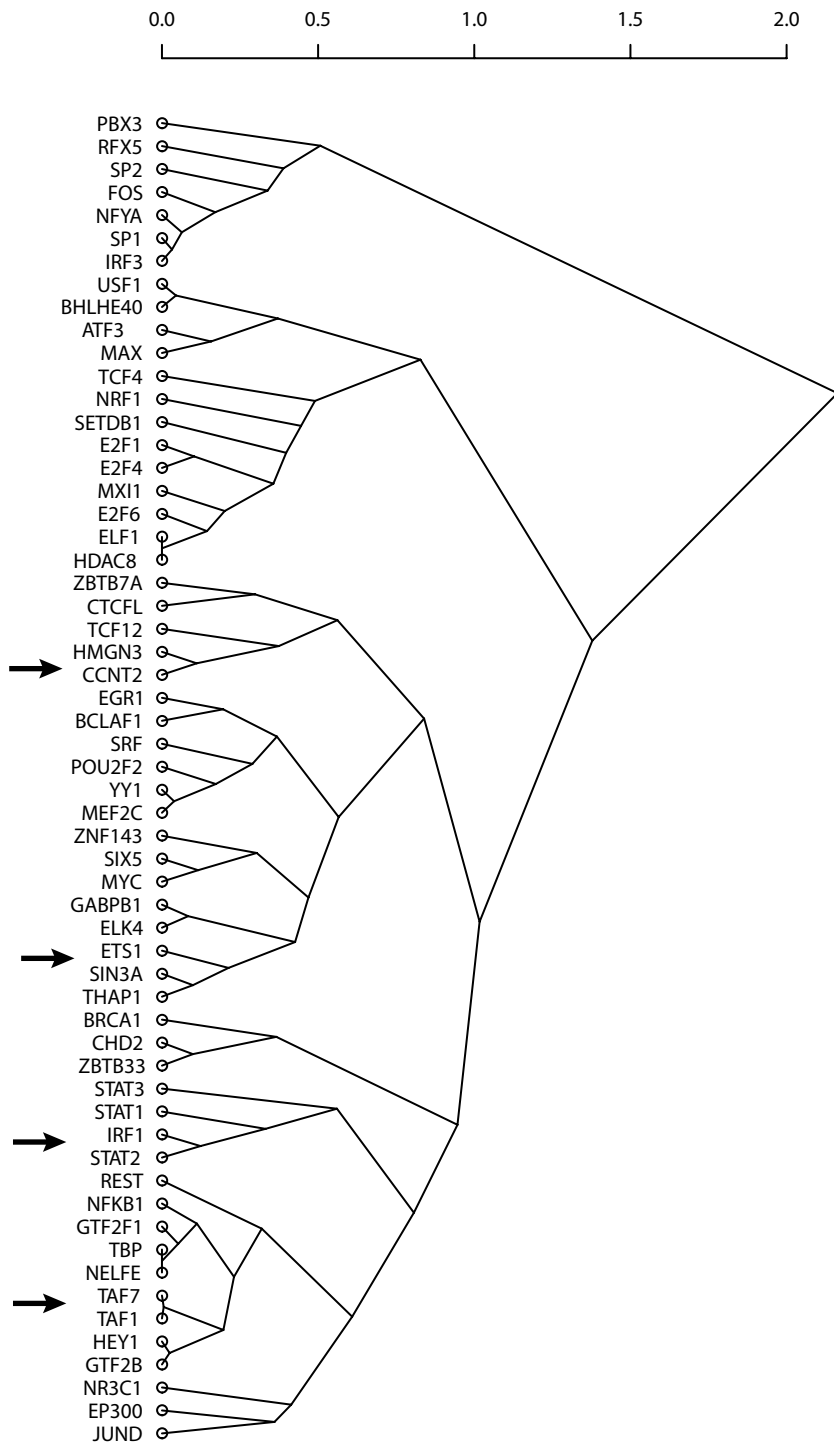

Supplementary Figure 5. Hierarchical clustering of 58 enriched TFs, based on their binding site co-occurrences in the promoters of similar sets of DE genes at 12 hpi during HIV-1 infection. The arrows mark examples of expected pairings like IRF1-STAT1-STAT2-STAT3 and TAF7-TAF1, or previously observed ones like CCNT2-HMGN3, and novel ones like ETS1-SIN3A.

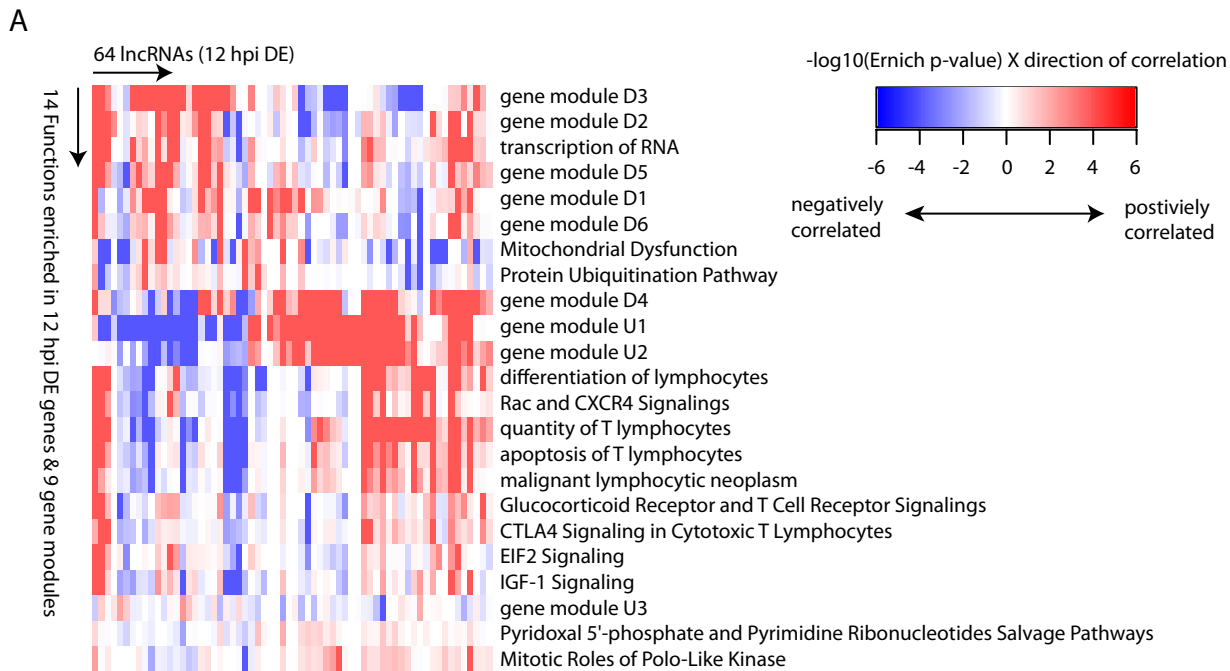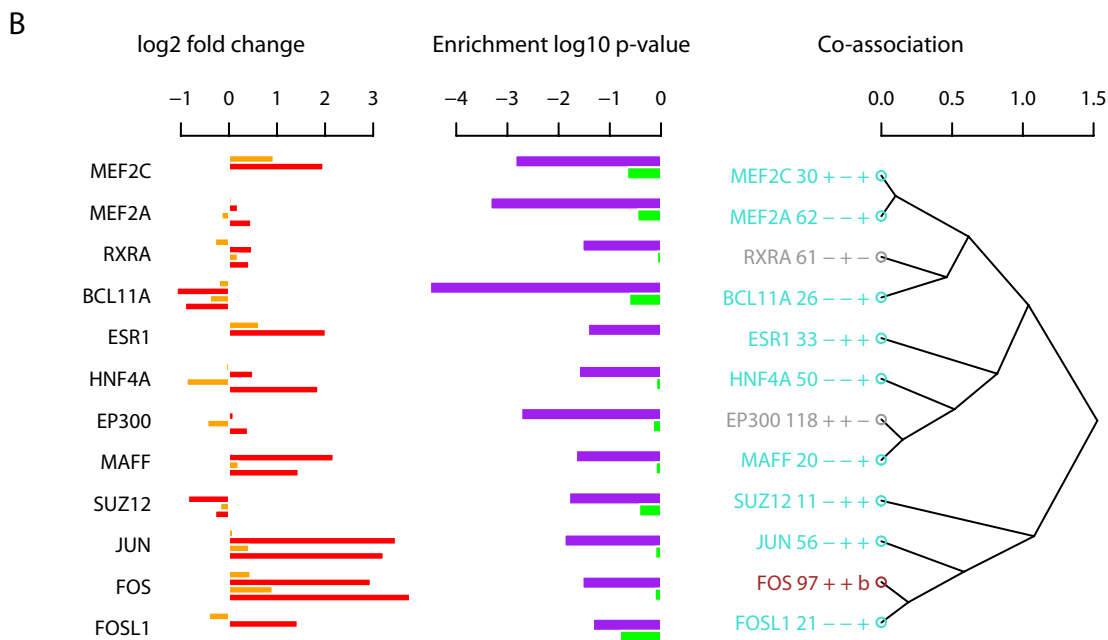

Supplementary Figure 6. LncRNA function and TF inference. A. LncRNA and biological function association matrix. Functions (rows) and lncRNAs (columns) are shown as positively (red), negatively (blue) or not associated (white) with lncRNA tissue expression profiles. The results were limited to functions enriched in genes differentially expressed at 12 hpi and identified gene modules as described later, and lncRNAs differentially expressed at 12 hpi. For the GSEA analysis, we built custom gene sets by extracting out the 12 hpi DE genes from the functions enriched in 12 hpi DE genes (Fig 2E), one gene set for each function. Similarly a gene set was constructed for each gene module. B. Transcription factors (TF) binding sites enriched in promoters of differentially expressed (DE) lncRNAs. Left, the log<sub>2</sub> infection/mock expression ratios of TFs enriched in DE lncRNAs but not in non-DE lncRNAs at 12 (orange) and 24 (red) hpi, in the order of mRNAseq and Total RNAseq. Middle, enrichment p-values of TFs enriched in either DE (purple) or non-DE (green) lncRNAs. Right, Hierarchical clustering of TFs based on the degrees of binding site co-occurring in the same promoters. The labels of the leaves are in the order: name, number of target lncRNA, TF enriched in 12 DE genes (+) or not (-), with at least one documented interaction with HIV-1 protein (+) or not, and DE during HIV-1 infection ('b' for 12 hpi DE subgroup b and '+' for DE at 24 hpi) or not (-).

A

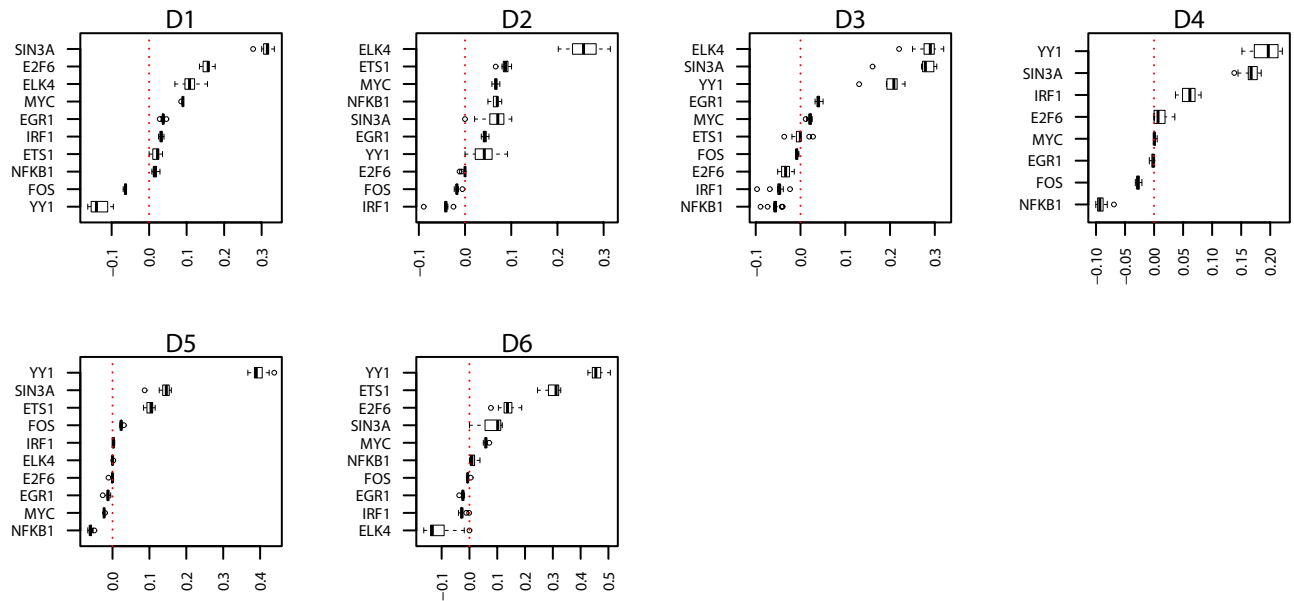

B

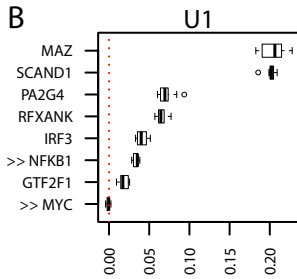

Supplementary Figure 7. Regression coefficients of the predictive models learned from the compendium expression data. A. Similarly as in Figure 6B (top), the regression coefficients of the predictive models learned for gene models 'D1-D6' with 10 identified TFs as candidate regulators. B. Similarly as in Figure 6B (top), the regression coefficients of the predictive models learned for gene models 'U1' with the expanded set of 115 candidate regulators (102 TFs and 13 lncRNAs) as predictors. The double arrows indicate TFs which were in the set of 10 identified TFs. The regression coefficients for other gene models were omitted due to their inaccurate predictions.

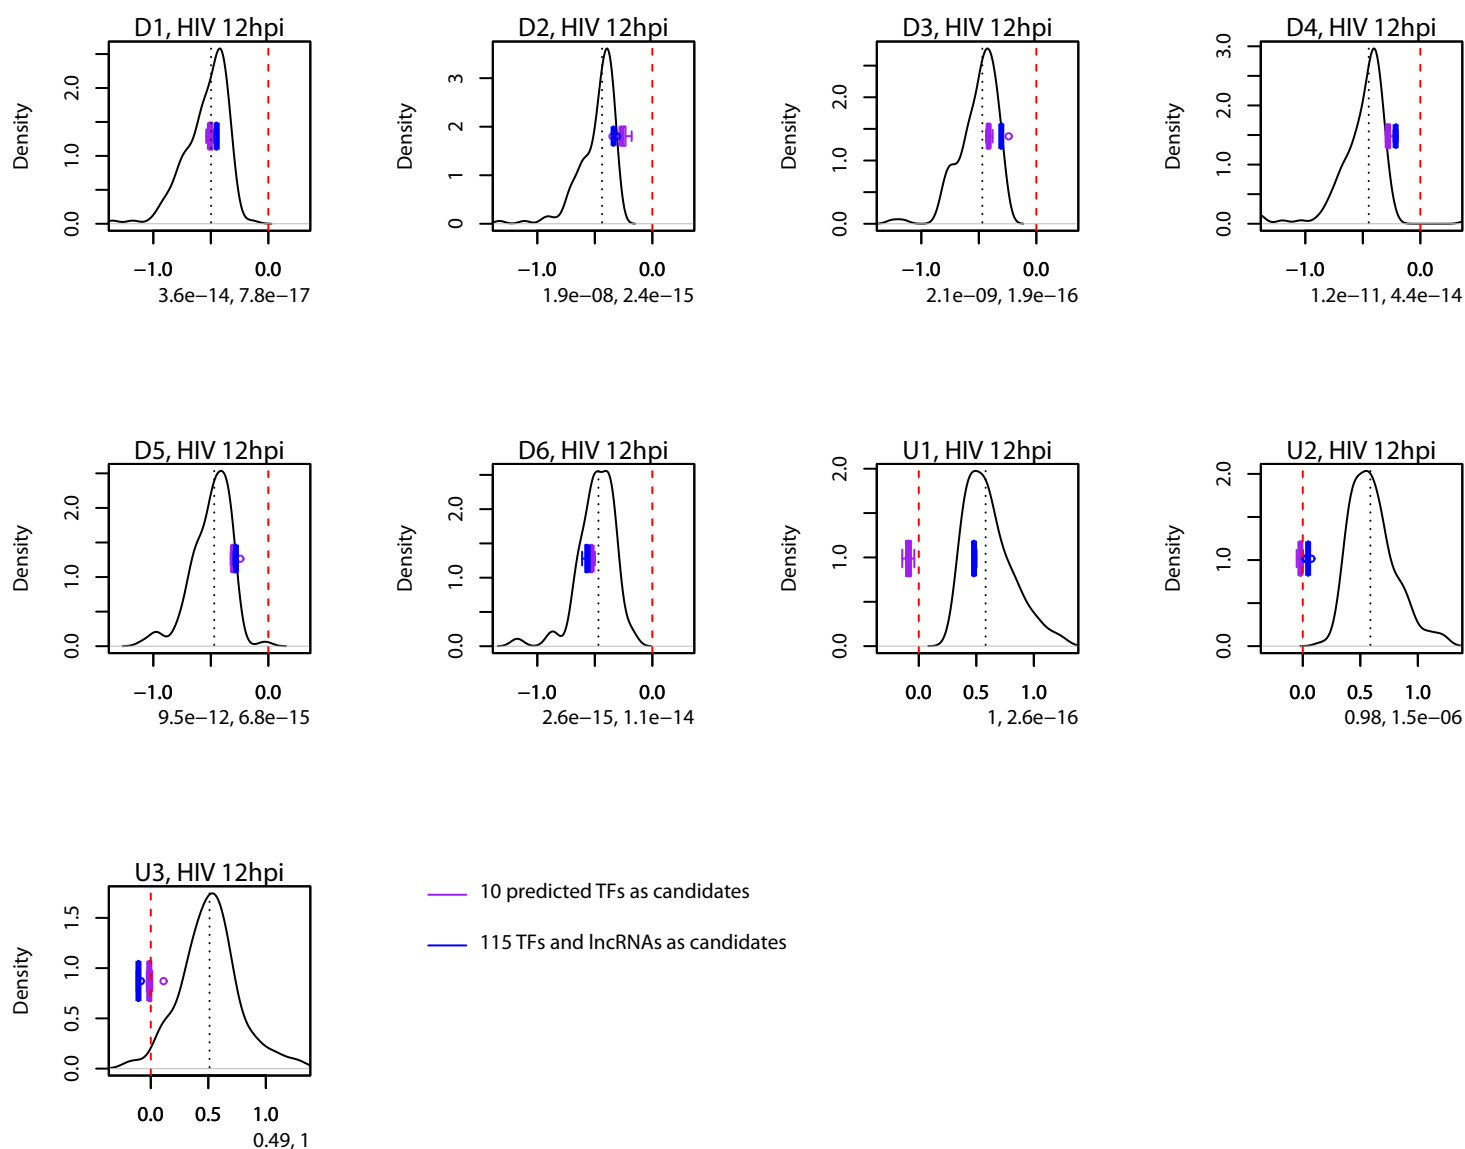

Supplementary Figure 8. Predicted gene module expression changes at 12hpi during HIV infection for all 9 gene modules. Similarly as in Figure 6B (bottom), the boxplot in purple shows the spread of 10 predicted values from the learned models with 10 identified TFs as candidate regulators, and the blue one for the learned models with the expanded set of 115 candidate regulators as predictors. The black line shows the distribution of gene expression changes measured at 12hpi (Total RNAseq).

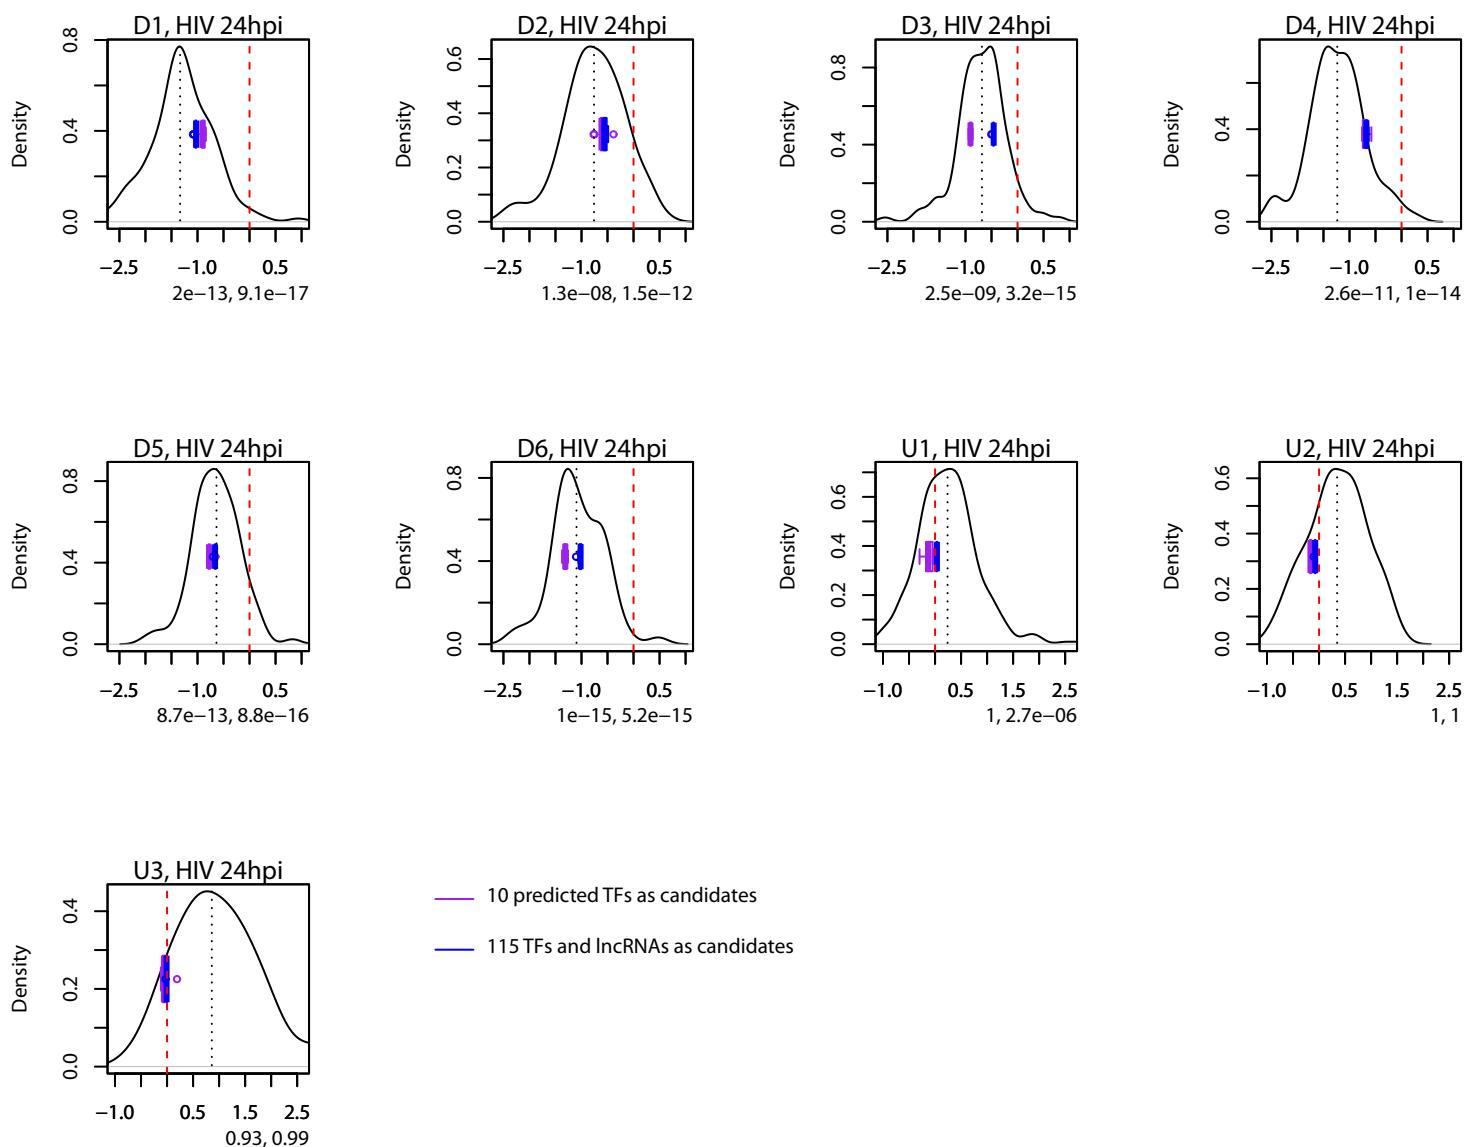

Supplementary Figure 9. Predicted gene module expression changes at 24hpi during HIV infection for all 9 gene modules. Similarly as in Figure 6B (bottom), the boxplot in purple shows the spread of 10 predicted values from the learned models with 10 identified TFs as candidate regulators, and the blue one for the learned models with the expanded set of 115 candidate regulators as predictors. The black line shows the distribution of gene expression changes measured at 24hpi (mRNAseq).

A

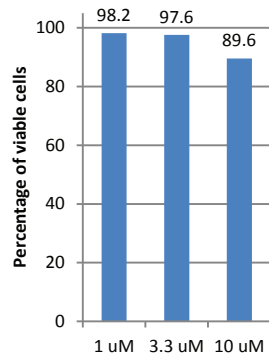

B

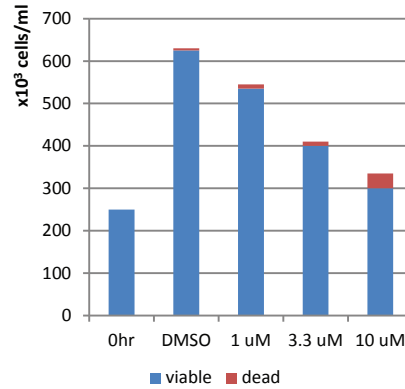

Supplementary Figure 10. Cell counts under lycorine treatment, without HIV infection. A. Percentage of viable cells in uninfected cultures of SUP-T1 cells treated with increasing concentration of lycorine at 24 hours post treatment. B. Cell counts in the same lycorine treated samples at 24 hours post treatment, in comparison to the starting number of cells (250x10<sup>3</sup> cells/ml). DMSO is the negative control for lycorine treatment. The dead cells were identified using trypan-blue exclusion assay. A representative experiment is shown here.
